# Supplementary material for: HIV status disclosure by Nigerian men who have sex with men and transgender women living with HIV: a cross-sectional analysis at enrollment into an observational cohort
Source: Springer Nature journal article supplement (doi:10.1186/s12889-020-09315-y), 2020-08-26
Supplement: MOESM2 [file 18317526]

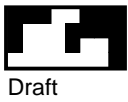

Draft

# TRUST QUESTIONNAIRE

Module 7 - Risk in MSM Sexual Network

# VISIT 1

|                                                                                            |                                                                                         |                                                                    |
|--------------------------------------------------------------------------------------------|-----------------------------------------------------------------------------------------|--------------------------------------------------------------------|
| Visit Date (dd/mm/yyyy) <input type="text"/> / <input type="text"/> / <input type="text"/> | Interviewer ID <input type="text"/>                                                     | Location: <input type="radio"/> CHC <input type="radio"/> 68 NARHY |
| Study Number: <input style="width: 100%;" type="text"/>                                    | RDS Coupon Number used to recruit participant <input style="width: 100%;" type="text"/> |                                                                    |

## MODULE 7 - Risk in MSM Sexual Network

The next set of questions will ask you more details about the men with whom you have had anal or oral sex with in the past year.

| No.  | Question                                                                                     | Coded Responses (Shade in the appropriate circles)                                                                                                                                                                                  |
|------|----------------------------------------------------------------------------------------------|-------------------------------------------------------------------------------------------------------------------------------------------------------------------------------------------------------------------------------------|
| 7.01 | In all with how many different men did you have anal or oral sex with in the past 12 months? | <p><i>[Record the number of men. If 000 skip to 8.01]</i></p> <p>888 = Refusal [skip to 8.01]<br/>999 = Don't know [skip to 8.01]</p> <div style="text-align: right;"><input style="width: 30px; height: 20px;" type="text"/></div> |

Can you tell me the initials or use a pseudonym for the five men you most recently had anal or oral sex with in the past year, starting with the man with whom you most recently had anal or oral sex. A pseudonym is a fake name that you can use in place of their real name. If you use a pseudonym, use one that will allow you to remember the person that you are using it for. All the questions are regarding the period that you maintained a relationship with each partner, unless specified in contrary.

ENTER INITIALS OR PSEUDONYM OF FIVE MOST RESENT SEXUAL PARTNERS

|                                              |                                              |                                              |  |
|----------------------------------------------|----------------------------------------------|----------------------------------------------|--|
| 1. <input style="width: 100%;" type="text"/> | 2. <input style="width: 100%;" type="text"/> | 3. <input style="width: 100%;" type="text"/> |  |
| 4. <input style="width: 100%;" type="text"/> | 5. <input style="width: 100%;" type="text"/> |                                              |  |

|                                                                                                                                                                                                                        | FIVE MOST RESENT SEXUAL PARTNERS                                                                                                                                                                                             |                                                                                                                                                                                                                              |                                                                                                                                                                                                                              |                                                                                                                                                                                                                              |                                                                                                                                                                                                                              |
|------------------------------------------------------------------------------------------------------------------------------------------------------------------------------------------------------------------------|------------------------------------------------------------------------------------------------------------------------------------------------------------------------------------------------------------------------------|------------------------------------------------------------------------------------------------------------------------------------------------------------------------------------------------------------------------------|------------------------------------------------------------------------------------------------------------------------------------------------------------------------------------------------------------------------------|------------------------------------------------------------------------------------------------------------------------------------------------------------------------------------------------------------------------------|------------------------------------------------------------------------------------------------------------------------------------------------------------------------------------------------------------------------------|
|                                                                                                                                                                                                                        | 1.                                                                                                                                                                                                                           | 2.                                                                                                                                                                                                                           | 3.                                                                                                                                                                                                                           | 4.                                                                                                                                                                                                                           | 5.                                                                                                                                                                                                                           |
| 7.02 Record [NAME] age in years<br>88 = Refusal<br>99 = Don't Know                                                                                                                                                     | <input style="width: 30px; height: 20px;" type="text"/>                                                                                                                                                                      | <input style="width: 30px; height: 20px;" type="text"/>                                                                                                                                                                      | <input style="width: 30px; height: 20px;" type="text"/>                                                                                                                                                                      | <input style="width: 30px; height: 20px;" type="text"/>                                                                                                                                                                      | <input style="width: 30px; height: 20px;" type="text"/>                                                                                                                                                                      |
| 7.021 How old is [NAME] relative to you?<br>01 = Older<br>02 = Same age<br>03 = Younger<br>88 = Refusal<br>99 = Don't know                                                                                             | <input type="radio"/> 01<br><input type="radio"/> 02<br><input type="radio"/> 03<br><input type="radio"/> 88<br><input type="radio"/> 99                                                                                     | <input type="radio"/> 01<br><input type="radio"/> 02<br><input type="radio"/> 03<br><input type="radio"/> 88<br><input type="radio"/> 99                                                                                     | <input type="radio"/> 01<br><input type="radio"/> 02<br><input type="radio"/> 03<br><input type="radio"/> 88<br><input type="radio"/> 99                                                                                     | <input type="radio"/> 01<br><input type="radio"/> 02<br><input type="radio"/> 03<br><input type="radio"/> 88<br><input type="radio"/> 99                                                                                     | <input type="radio"/> 01<br><input type="radio"/> 02<br><input type="radio"/> 03<br><input type="radio"/> 88<br><input type="radio"/> 99                                                                                     |
| 7.03 [NAME] level of education:<br>00 = Never been to school<br>01 = Quranic<br>02 = Primary<br>03 = Junior Secondary<br>04 = Senior Secondary<br>05 = Higher then Senior Secondary<br>88 = Refusal<br>99 = Don't Know | <input type="radio"/> 00<br><input type="radio"/> 01<br><input type="radio"/> 02<br><input type="radio"/> 03<br><input type="radio"/> 04<br><input type="radio"/> 05<br><input type="radio"/> 88<br><input type="radio"/> 99 | <input type="radio"/> 00<br><input type="radio"/> 01<br><input type="radio"/> 02<br><input type="radio"/> 03<br><input type="radio"/> 04<br><input type="radio"/> 05<br><input type="radio"/> 88<br><input type="radio"/> 99 | <input type="radio"/> 00<br><input type="radio"/> 01<br><input type="radio"/> 02<br><input type="radio"/> 03<br><input type="radio"/> 04<br><input type="radio"/> 05<br><input type="radio"/> 88<br><input type="radio"/> 99 | <input type="radio"/> 00<br><input type="radio"/> 01<br><input type="radio"/> 02<br><input type="radio"/> 03<br><input type="radio"/> 04<br><input type="radio"/> 05<br><input type="radio"/> 88<br><input type="radio"/> 99 | <input type="radio"/> 00<br><input type="radio"/> 01<br><input type="radio"/> 02<br><input type="radio"/> 03<br><input type="radio"/> 04<br><input type="radio"/> 05<br><input type="radio"/> 88<br><input type="radio"/> 99 |
| 7.031 What is [NAME]'s religion?<br>01 = Protestant/other Christian<br>02 = Muslim<br>03 = No religion<br>04 = Other<br>88 = Refusal<br>99 = Don't know                                                                | <input type="radio"/> 01<br><input type="radio"/> 02<br><input type="radio"/> 03<br><input type="radio"/> 04<br><input type="radio"/> 88<br><input type="radio"/> 99                                                         | <input type="radio"/> 01<br><input type="radio"/> 02<br><input type="radio"/> 03<br><input type="radio"/> 04<br><input type="radio"/> 88<br><input type="radio"/> 99                                                         | <input type="radio"/> 01<br><input type="radio"/> 02<br><input type="radio"/> 03<br><input type="radio"/> 04<br><input type="radio"/> 88<br><input type="radio"/> 99                                                         | <input type="radio"/> 01<br><input type="radio"/> 02<br><input type="radio"/> 03<br><input type="radio"/> 04<br><input type="radio"/> 88<br><input type="radio"/> 99                                                         | <input type="radio"/> 01<br><input type="radio"/> 02<br><input type="radio"/> 03<br><input type="radio"/> 04<br><input type="radio"/> 88<br><input type="radio"/> 99                                                         |

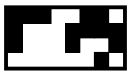

Draft

# TRUST QUESTIONNAIRE

## VISIT 1

Module 7 - Risk in MSM Sexual Network

Study Number:

Visit Date (dd/mm/yyyy)

 /  / 

|                                                                                                                                                                                                                                                              | FIVE MOST RESENT SEXUAL PARTNERS                                                                                                                                                                                                                                                     |                                                                                                                                                                                                                                                                                      |                                                                                                                                                                                                                                                                                      |                                                                                                                                                                                                                                                                                      |                                                                                                                                                                                                                                                                                      |
|--------------------------------------------------------------------------------------------------------------------------------------------------------------------------------------------------------------------------------------------------------------|--------------------------------------------------------------------------------------------------------------------------------------------------------------------------------------------------------------------------------------------------------------------------------------|--------------------------------------------------------------------------------------------------------------------------------------------------------------------------------------------------------------------------------------------------------------------------------------|--------------------------------------------------------------------------------------------------------------------------------------------------------------------------------------------------------------------------------------------------------------------------------------|--------------------------------------------------------------------------------------------------------------------------------------------------------------------------------------------------------------------------------------------------------------------------------------|--------------------------------------------------------------------------------------------------------------------------------------------------------------------------------------------------------------------------------------------------------------------------------------|
|                                                                                                                                                                                                                                                              | 1.                                                                                                                                                                                                                                                                                   | 2.                                                                                                                                                                                                                                                                                   | 3.                                                                                                                                                                                                                                                                                   | 4.                                                                                                                                                                                                                                                                                   | 5.                                                                                                                                                                                                                                                                                   |
| <b>7.032</b> What is [NAME]'s occupation?<br>01 = Not working<br>02 = Pupil/student<br>03 = Professional<br>04 = Self employed<br>05 = Entertainment/service<br>06 = Driver/laborer<br>07 = Military/police<br>08 = Other<br>88 = Refusal<br>99 = Don't know | <input type="radio"/> 01<br><input type="radio"/> 02<br><input type="radio"/> 03<br><input type="radio"/> 04<br><input type="radio"/> 05<br><input type="radio"/> 06<br><input type="radio"/> 07<br><input type="radio"/> 08<br><input type="radio"/> 88<br><input type="radio"/> 99 | <input type="radio"/> 01<br><input type="radio"/> 02<br><input type="radio"/> 03<br><input type="radio"/> 04<br><input type="radio"/> 05<br><input type="radio"/> 06<br><input type="radio"/> 07<br><input type="radio"/> 08<br><input type="radio"/> 88<br><input type="radio"/> 99 | <input type="radio"/> 01<br><input type="radio"/> 02<br><input type="radio"/> 03<br><input type="radio"/> 04<br><input type="radio"/> 05<br><input type="radio"/> 06<br><input type="radio"/> 07<br><input type="radio"/> 08<br><input type="radio"/> 88<br><input type="radio"/> 99 | <input type="radio"/> 01<br><input type="radio"/> 02<br><input type="radio"/> 03<br><input type="radio"/> 04<br><input type="radio"/> 05<br><input type="radio"/> 06<br><input type="radio"/> 07<br><input type="radio"/> 08<br><input type="radio"/> 88<br><input type="radio"/> 99 | <input type="radio"/> 01<br><input type="radio"/> 02<br><input type="radio"/> 03<br><input type="radio"/> 04<br><input type="radio"/> 05<br><input type="radio"/> 06<br><input type="radio"/> 07<br><input type="radio"/> 08<br><input type="radio"/> 88<br><input type="radio"/> 99 |
| <b>7.04</b> [NAME] marital status during the relationship period?<br>01 = Married to a woman<br>02 = Cohabiting<br>03 = Separated or divorced<br>04 = Widowed<br>05 = Single or Married<br>88 = Refusal<br>99 = Don't know                                   | <input type="radio"/> 01<br><input type="radio"/> 02<br><input type="radio"/> 03<br><input type="radio"/> 04<br><input type="radio"/> 05<br><input type="radio"/> 88<br><input type="radio"/> 99                                                                                     | <input type="radio"/> 01<br><input type="radio"/> 02<br><input type="radio"/> 03<br><input type="radio"/> 04<br><input type="radio"/> 05<br><input type="radio"/> 88<br><input type="radio"/> 99                                                                                     | <input type="radio"/> 01<br><input type="radio"/> 02<br><input type="radio"/> 03<br><input type="radio"/> 04<br><input type="radio"/> 05<br><input type="radio"/> 88<br><input type="radio"/> 99                                                                                     | <input type="radio"/> 01<br><input type="radio"/> 02<br><input type="radio"/> 03<br><input type="radio"/> 04<br><input type="radio"/> 05<br><input type="radio"/> 88<br><input type="radio"/> 99                                                                                     | <input type="radio"/> 01<br><input type="radio"/> 02<br><input type="radio"/> 03<br><input type="radio"/> 04<br><input type="radio"/> 05<br><input type="radio"/> 88<br><input type="radio"/> 99                                                                                     |
| <b>7.05</b> How would you classify [NAME] socio-economic level, compared to yours?<br>01 = Lower<br>02 = The same<br>03 = Higher<br>88 = Refusal<br>99 = Don't Know                                                                                          | <input type="radio"/> 01<br><input type="radio"/> 02<br><input type="radio"/> 03<br><input type="radio"/> 88<br><input type="radio"/> 99                                                                                                                                             | <input type="radio"/> 01<br><input type="radio"/> 02<br><input type="radio"/> 03<br><input type="radio"/> 88<br><input type="radio"/> 99                                                                                                                                             | <input type="radio"/> 01<br><input type="radio"/> 02<br><input type="radio"/> 03<br><input type="radio"/> 88<br><input type="radio"/> 99                                                                                                                                             | <input type="radio"/> 01<br><input type="radio"/> 02<br><input type="radio"/> 03<br><input type="radio"/> 88<br><input type="radio"/> 99                                                                                                                                             | <input type="radio"/> 01<br><input type="radio"/> 02<br><input type="radio"/> 03<br><input type="radio"/> 88<br><input type="radio"/> 99                                                                                                                                             |
| <b>7.06</b> Rate the strength of friendship with [NAME] from 0 to 10,<br>[0 being 'acquaintance' and 10 being 'best friend']<br>88 = Refusal<br>99 = Don't Know                                                                                              | <input type="text"/>                                                                                                                                                                                                                                                                 | <input type="text"/>                                                                                                                                                                                                                                                                 | <input type="text"/>                                                                                                                                                                                                                                                                 | <input type="text"/>                                                                                                                                                                                                                                                                 | <input type="text"/>                                                                                                                                                                                                                                                                 |
| <b>7.061</b> How much do you trust [NAME]?<br>00 = Do not trust<br>01 = Neutral<br>02 = A little trust<br>03 = A lot of trust<br>88 = Refusal<br>99 = Don't know                                                                                             | <input type="radio"/> 00<br><input type="radio"/> 01<br><input type="radio"/> 02<br><input type="radio"/> 03<br><input type="radio"/> 88<br><input type="radio"/> 99                                                                                                                 | <input type="radio"/> 00<br><input type="radio"/> 01<br><input type="radio"/> 02<br><input type="radio"/> 03<br><input type="radio"/> 88<br><input type="radio"/> 99                                                                                                                 | <input type="radio"/> 00<br><input type="radio"/> 01<br><input type="radio"/> 02<br><input type="radio"/> 03<br><input type="radio"/> 88<br><input type="radio"/> 99                                                                                                                 | <input type="radio"/> 00<br><input type="radio"/> 01<br><input type="radio"/> 02<br><input type="radio"/> 03<br><input type="radio"/> 88<br><input type="radio"/> 99                                                                                                                 | <input type="radio"/> 00<br><input type="radio"/> 01<br><input type="radio"/> 02<br><input type="radio"/> 03<br><input type="radio"/> 88<br><input type="radio"/> 99                                                                                                                 |
| <b>7.07</b> [NAME] is what type of sexual partner:<br>01 = Regular<br>02 = Casual (By casual partner, this means a man that you have sex with,<br>but you don't feel committed to)<br>88 = Refusal<br>99 = Don't know                                        | <input type="radio"/> 01<br><input type="radio"/> 02<br><input type="radio"/> 88<br><input type="radio"/> 99                                                                                                                                                                         | <input type="radio"/> 01<br><input type="radio"/> 02<br><input type="radio"/> 88<br><input type="radio"/> 99                                                                                                                                                                         | <input type="radio"/> 01<br><input type="radio"/> 02<br><input type="radio"/> 88<br><input type="radio"/> 99                                                                                                                                                                         | <input type="radio"/> 01<br><input type="radio"/> 02<br><input type="radio"/> 88<br><input type="radio"/> 99                                                                                                                                                                         | <input type="radio"/> 01<br><input type="radio"/> 02<br><input type="radio"/> 88<br><input type="radio"/> 99                                                                                                                                                                         |
| <b>7.071</b> What month and year did your relationship with [NAME] begin ?<br><br>88 = Refusal<br>99 = Don't know                                                                                                                                            | <input type="text"/><br>(month)                                                                                                                                                                                                                                                      | <input type="text"/><br>(month)                                                                                                                                                                                                                                                      | <input type="text"/><br>(month)                                                                                                                                                                                                                                                      | <input type="text"/><br>(month)                                                                                                                                                                                                                                                      | <input type="text"/><br>(month)                                                                                                                                                                                                                                                      |
|                                                                                                                                                                                                                                                              | <input type="text"/><br>(year)                                                                                                                                                                                                                                                       | <input type="text"/><br>(year)                                                                                                                                                                                                                                                       | <input type="text"/><br>(year)                                                                                                                                                                                                                                                       | <input type="text"/><br>(year)                                                                                                                                                                                                                                                       | <input type="text"/><br>(year)                                                                                                                                                                                                                                                       |
| <b>7.072</b> What month and year did your relationship with [NAME] end (MMYY)?<br><br>00 = Relationship still ongoing<br>88 = Refusal<br>99 = Don't know                                                                                                     | <input type="text"/><br>(month)                                                                                                                                                                                                                                                      | <input type="text"/><br>(month)                                                                                                                                                                                                                                                      | <input type="text"/><br>(month)                                                                                                                                                                                                                                                      | <input type="text"/><br>(month)                                                                                                                                                                                                                                                      | <input type="text"/><br>(month)                                                                                                                                                                                                                                                      |
|                                                                                                                                                                                                                                                              | <input type="text"/><br>(year)                                                                                                                                                                                                                                                       | <input type="text"/><br>(year)                                                                                                                                                                                                                                                       | <input type="text"/><br>(year)                                                                                                                                                                                                                                                       | <input type="text"/><br>(year)                                                                                                                                                                                                                                                       | <input type="text"/><br>(year)                                                                                                                                                                                                                                                       |
| <b>7.073</b> Did you meet [NAME] through the internet?<br>01 = No<br>02 = Yes<br>88 = Refusal<br>99 = Don't know                                                                                                                                             | <input type="radio"/> 01<br><input type="radio"/> 02<br><input type="radio"/> 88<br><input type="radio"/> 99                                                                                                                                                                         | <input type="radio"/> 01<br><input type="radio"/> 02<br><input type="radio"/> 88<br><input type="radio"/> 99                                                                                                                                                                         | <input type="radio"/> 01<br><input type="radio"/> 02<br><input type="radio"/> 88<br><input type="radio"/> 99                                                                                                                                                                         | <input type="radio"/> 01<br><input type="radio"/> 02<br><input type="radio"/> 88<br><input type="radio"/> 99                                                                                                                                                                         | <input type="radio"/> 01<br><input type="radio"/> 02<br><input type="radio"/> 88<br><input type="radio"/> 99                                                                                                                                                                         |

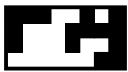

Draft

# TRUST QUESTIONNAIRE

Module 7 - Risk in MSM Sexual Network

## VISIT 1

Study Number:

Visit Date (dd/mm/yyyy)

 /  / 

|                                                                                                                                                                                                                                                                              | FIVE MOST RESENT SEXUAL PARTNERS |                          |                          |                          |                          |
|------------------------------------------------------------------------------------------------------------------------------------------------------------------------------------------------------------------------------------------------------------------------------|----------------------------------|--------------------------|--------------------------|--------------------------|--------------------------|
|                                                                                                                                                                                                                                                                              | 1.                               | 2.                       | 3.                       | 4.                       | 5.                       |
| <b>7.08</b> How frequently did you have sex with [NAME]?<br>01 = Almost every day<br>02 = A few times each week<br>03 = A few times each month<br>04 = Once a month or fewer times<br>77 = I had sex only once or twice with this partner<br>88 = Refusal<br>99 = Don't Know | <input type="radio"/> 01         | <input type="radio"/> 01 | <input type="radio"/> 01 | <input type="radio"/> 01 | <input type="radio"/> 01 |
|                                                                                                                                                                                                                                                                              | <input type="radio"/> 02         | <input type="radio"/> 02 | <input type="radio"/> 02 | <input type="radio"/> 02 | <input type="radio"/> 02 |
|                                                                                                                                                                                                                                                                              | <input type="radio"/> 03         | <input type="radio"/> 03 | <input type="radio"/> 03 | <input type="radio"/> 03 | <input type="radio"/> 03 |
|                                                                                                                                                                                                                                                                              | <input type="radio"/> 04         | <input type="radio"/> 04 | <input type="radio"/> 04 | <input type="radio"/> 04 | <input type="radio"/> 04 |
|                                                                                                                                                                                                                                                                              | <input type="radio"/> 77         | <input type="radio"/> 77 | <input type="radio"/> 77 | <input type="radio"/> 77 | <input type="radio"/> 77 |
|                                                                                                                                                                                                                                                                              | <input type="radio"/> 88         | <input type="radio"/> 88 | <input type="radio"/> 88 | <input type="radio"/> 88 | <input type="radio"/> 88 |
|                                                                                                                                                                                                                                                                              | <input type="radio"/> 99         | <input type="radio"/> 99 | <input type="radio"/> 99 | <input type="radio"/> 99 | <input type="radio"/> 99 |
| <b>7.081</b> Does [NAME] encourage you to use condoms?<br>01 = No<br>02 = Yes<br>88 = Refusal<br>99 = Don't know                                                                                                                                                             | <input type="radio"/> 01         | <input type="radio"/> 01 | <input type="radio"/> 01 | <input type="radio"/> 01 | <input type="radio"/> 01 |
|                                                                                                                                                                                                                                                                              | <input type="radio"/> 02         | <input type="radio"/> 02 | <input type="radio"/> 02 | <input type="radio"/> 02 | <input type="radio"/> 02 |
|                                                                                                                                                                                                                                                                              | <input type="radio"/> 88         | <input type="radio"/> 88 | <input type="radio"/> 88 | <input type="radio"/> 88 | <input type="radio"/> 88 |
|                                                                                                                                                                                                                                                                              | <input type="radio"/> 99         | <input type="radio"/> 99 | <input type="radio"/> 99 | <input type="radio"/> 99 | <input type="radio"/> 99 |
| <b>7.082</b> If you are HIV negative, does [NAME] encourage you to get tested for HIV?<br>01 = No<br>02 = Yes<br>88 = Refusal<br>99 = Don't know                                                                                                                             | <input type="radio"/> 01         | <input type="radio"/> 01 | <input type="radio"/> 01 | <input type="radio"/> 01 | <input type="radio"/> 01 |
|                                                                                                                                                                                                                                                                              | <input type="radio"/> 02         | <input type="radio"/> 02 | <input type="radio"/> 02 | <input type="radio"/> 02 | <input type="radio"/> 02 |
|                                                                                                                                                                                                                                                                              | <input type="radio"/> 88         | <input type="radio"/> 88 | <input type="radio"/> 88 | <input type="radio"/> 88 | <input type="radio"/> 88 |
|                                                                                                                                                                                                                                                                              | <input type="radio"/> 99         | <input type="radio"/> 99 | <input type="radio"/> 99 | <input type="radio"/> 99 | <input type="radio"/> 99 |
| <b>7.09</b> How would you define [NAME] sexual orientation?<br>01 = Homosexual (gay)<br>02 = Bisexual<br>03 = Heterosexual<br>04 = Transgender<br>88 = Refusal<br>99 = Don't Know                                                                                            | <input type="radio"/> 01         | <input type="radio"/> 01 | <input type="radio"/> 01 | <input type="radio"/> 01 | <input type="radio"/> 01 |
|                                                                                                                                                                                                                                                                              | <input type="radio"/> 02         | <input type="radio"/> 02 | <input type="radio"/> 02 | <input type="radio"/> 02 | <input type="radio"/> 02 |
|                                                                                                                                                                                                                                                                              | <input type="radio"/> 03         | <input type="radio"/> 03 | <input type="radio"/> 03 | <input type="radio"/> 03 | <input type="radio"/> 03 |
|                                                                                                                                                                                                                                                                              | <input type="radio"/> 04         | <input type="radio"/> 04 | <input type="radio"/> 04 | <input type="radio"/> 04 | <input type="radio"/> 04 |
|                                                                                                                                                                                                                                                                              | <input type="radio"/> 88         | <input type="radio"/> 88 | <input type="radio"/> 88 | <input type="radio"/> 88 | <input type="radio"/> 88 |
|                                                                                                                                                                                                                                                                              | <input type="radio"/> 99         | <input type="radio"/> 99 | <input type="radio"/> 99 | <input type="radio"/> 99 | <input type="radio"/> 99 |
| <b>7.091</b> What does [NAME] consider to be his gender?<br>01 = Man<br>02 = Woman<br>03 = Other (if other, specify below)<br>04 = Both man and woman<br>88 = Refusal<br>99 = Don't Know                                                                                     | <input type="radio"/> 01         | <input type="radio"/> 01 | <input type="radio"/> 01 | <input type="radio"/> 01 | <input type="radio"/> 01 |
|                                                                                                                                                                                                                                                                              | <input type="radio"/> 02         | <input type="radio"/> 02 | <input type="radio"/> 02 | <input type="radio"/> 02 | <input type="radio"/> 02 |
|                                                                                                                                                                                                                                                                              | <input type="radio"/> 03         | <input type="radio"/> 03 | <input type="radio"/> 03 | <input type="radio"/> 03 | <input type="radio"/> 03 |
|                                                                                                                                                                                                                                                                              | <input type="radio"/> 04         | <input type="radio"/> 04 | <input type="radio"/> 04 | <input type="radio"/> 04 | <input type="radio"/> 04 |
|                                                                                                                                                                                                                                                                              | <input type="radio"/> 88         | <input type="radio"/> 88 | <input type="radio"/> 88 | <input type="radio"/> 88 | <input type="radio"/> 88 |
|                                                                                                                                                                                                                                                                              | <input type="radio"/> 99         | <input type="radio"/> 99 | <input type="radio"/> 99 | <input type="radio"/> 99 | <input type="radio"/> 99 |
| If other gender (03) selected above, please specify:      Other 1: _____      Other 2: _____<br>Other 3: _____      Other 4: _____      Other 5: _____                                                                                                                       |                                  |                          |                          |                          |                          |
| <b>7.10</b> How would you rate [NAME] chance of acquiring the AIDS virus from 0 (impossible) to 10 (I think he/she has AIDS)?<br>88 = Refusal<br>99 = Don't know                                                                                                             | <input type="text"/>             | <input type="text"/>     | <input type="text"/>     | <input type="text"/>     | <input type="text"/>     |
| <b>7.11</b> As far as you know, is [NAME] living with HIV?<br>01 = No<br>02 = Yes<br>88 = Refusal<br>99 = Don't Know                                                                                                                                                         | <input type="radio"/> 01         | <input type="radio"/> 01 | <input type="radio"/> 01 | <input type="radio"/> 01 | <input type="radio"/> 01 |
|                                                                                                                                                                                                                                                                              | <input type="radio"/> 02         | <input type="radio"/> 02 | <input type="radio"/> 02 | <input type="radio"/> 02 | <input type="radio"/> 02 |
|                                                                                                                                                                                                                                                                              | <input type="radio"/> 88         | <input type="radio"/> 88 | <input type="radio"/> 88 | <input type="radio"/> 88 | <input type="radio"/> 88 |
|                                                                                                                                                                                                                                                                              | <input type="radio"/> 99         | <input type="radio"/> 99 | <input type="radio"/> 99 | <input type="radio"/> 99 | <input type="radio"/> 99 |
| <b>7.12</b> As far as you know, does [NAME] have any kind of sexually transmitted infection such as syphilis, gonorrhea or genital wart?<br>01 = No<br>02 = Yes<br>88 = Refusal<br>99 = Don't Know                                                                           | <input type="radio"/> 01         | <input type="radio"/> 01 | <input type="radio"/> 01 | <input type="radio"/> 01 | <input type="radio"/> 01 |
|                                                                                                                                                                                                                                                                              | <input type="radio"/> 02         | <input type="radio"/> 02 | <input type="radio"/> 02 | <input type="radio"/> 02 | <input type="radio"/> 02 |
|                                                                                                                                                                                                                                                                              | <input type="radio"/> 88         | <input type="radio"/> 88 | <input type="radio"/> 88 | <input type="radio"/> 88 | <input type="radio"/> 88 |
|                                                                                                                                                                                                                                                                              | <input type="radio"/> 99         | <input type="radio"/> 99 | <input type="radio"/> 99 | <input type="radio"/> 99 | <input type="radio"/> 99 |
| <b>7.13</b> If you had oral sex with [NAME], how often was a condom used?<br>01 = Never<br>02 = Almost never<br>03 = About half the time<br>04 = Almost always<br>05 = Always<br>77 = Did not have oral sex with this partner<br>88 = Refusal<br>99 = Don't Know             | <input type="radio"/> 01         | <input type="radio"/> 01 | <input type="radio"/> 01 | <input type="radio"/> 01 | <input type="radio"/> 01 |
|                                                                                                                                                                                                                                                                              | <input type="radio"/> 02         | <input type="radio"/> 02 | <input type="radio"/> 02 | <input type="radio"/> 02 | <input type="radio"/> 02 |
|                                                                                                                                                                                                                                                                              | <input type="radio"/> 03         | <input type="radio"/> 03 | <input type="radio"/> 03 | <input type="radio"/> 03 | <input type="radio"/> 03 |
|                                                                                                                                                                                                                                                                              | <input type="radio"/> 04         | <input type="radio"/> 04 | <input type="radio"/> 04 | <input type="radio"/> 04 | <input type="radio"/> 04 |
|                                                                                                                                                                                                                                                                              | <input type="radio"/> 05         | <input type="radio"/> 05 | <input type="radio"/> 05 | <input type="radio"/> 05 | <input type="radio"/> 05 |
|                                                                                                                                                                                                                                                                              | <input type="radio"/> 77         | <input type="radio"/> 77 | <input type="radio"/> 77 | <input type="radio"/> 77 | <input type="radio"/> 77 |
|                                                                                                                                                                                                                                                                              | <input type="radio"/> 88         | <input type="radio"/> 88 | <input type="radio"/> 88 | <input type="radio"/> 88 | <input type="radio"/> 88 |
|                                                                                                                                                                                                                                                                              | <input type="radio"/> 99         | <input type="radio"/> 99 | <input type="radio"/> 99 | <input type="radio"/> 99 | <input type="radio"/> 99 |

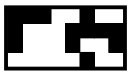

Draft

# TRUST QUESTIONNAIRE

Module 7 - Risk in MSM Sexual Network

# VISIT 1

Study Number:

Visit Date (dd/mm/yyyy)

 /  / 

|                                                                                                                                                                                                                                                                                                                                                  | FIVE MOST RESENT SEXUAL PARTNERS                                                                                                                                                                                             |                                                                                                                                                                                                                              |                                                                                                                                                                                                                              |                                                                                                                                                                                                                              |                                                                                                                                                                                                                              |
|--------------------------------------------------------------------------------------------------------------------------------------------------------------------------------------------------------------------------------------------------------------------------------------------------------------------------------------------------|------------------------------------------------------------------------------------------------------------------------------------------------------------------------------------------------------------------------------|------------------------------------------------------------------------------------------------------------------------------------------------------------------------------------------------------------------------------|------------------------------------------------------------------------------------------------------------------------------------------------------------------------------------------------------------------------------|------------------------------------------------------------------------------------------------------------------------------------------------------------------------------------------------------------------------------|------------------------------------------------------------------------------------------------------------------------------------------------------------------------------------------------------------------------------|
|                                                                                                                                                                                                                                                                                                                                                  | 1.                                                                                                                                                                                                                           | 2.                                                                                                                                                                                                                           | 3.                                                                                                                                                                                                                           | 4.                                                                                                                                                                                                                           | 5.                                                                                                                                                                                                                           |
| <p>7.14 When you had receptive anal sex with [NAME] (your partner's penis introduced in your anus), how often was a condom used?</p> <p>01 = Never<br/>02 = Almost never<br/>03 = About half the time<br/>04 = Almost always<br/>05 = Always<br/>77 = Did not have receptive anal sex with this partner<br/>88 = Refusal<br/>99 = Don't know</p> | <input type="radio"/> 01<br><input type="radio"/> 02<br><input type="radio"/> 03<br><input type="radio"/> 04<br><input type="radio"/> 05<br><input type="radio"/> 77<br><input type="radio"/> 88<br><input type="radio"/> 99 | <input type="radio"/> 01<br><input type="radio"/> 02<br><input type="radio"/> 03<br><input type="radio"/> 04<br><input type="radio"/> 05<br><input type="radio"/> 77<br><input type="radio"/> 88<br><input type="radio"/> 99 | <input type="radio"/> 01<br><input type="radio"/> 02<br><input type="radio"/> 03<br><input type="radio"/> 04<br><input type="radio"/> 05<br><input type="radio"/> 77<br><input type="radio"/> 88<br><input type="radio"/> 99 | <input type="radio"/> 01<br><input type="radio"/> 02<br><input type="radio"/> 03<br><input type="radio"/> 04<br><input type="radio"/> 05<br><input type="radio"/> 77<br><input type="radio"/> 88<br><input type="radio"/> 99 | <input type="radio"/> 01<br><input type="radio"/> 02<br><input type="radio"/> 03<br><input type="radio"/> 04<br><input type="radio"/> 05<br><input type="radio"/> 77<br><input type="radio"/> 88<br><input type="radio"/> 99 |
| <p>7.15 When you had insertive anal sex with [NAME] (your penis introduced in your partner's anus), how often was a condom used?</p> <p>01 = Never<br/>02 = Almost never<br/>03 = About half the time<br/>04 = Almost always<br/>05 = Always<br/>77 = Did not have insertive anal sex with this partner<br/>88 = Refusal<br/>99 = Don't Know</p> | <input type="radio"/> 01<br><input type="radio"/> 02<br><input type="radio"/> 03<br><input type="radio"/> 04<br><input type="radio"/> 05<br><input type="radio"/> 77<br><input type="radio"/> 88<br><input type="radio"/> 99 | <input type="radio"/> 01<br><input type="radio"/> 02<br><input type="radio"/> 03<br><input type="radio"/> 04<br><input type="radio"/> 05<br><input type="radio"/> 77<br><input type="radio"/> 88<br><input type="radio"/> 99 | <input type="radio"/> 01<br><input type="radio"/> 02<br><input type="radio"/> 03<br><input type="radio"/> 04<br><input type="radio"/> 05<br><input type="radio"/> 77<br><input type="radio"/> 88<br><input type="radio"/> 99 | <input type="radio"/> 01<br><input type="radio"/> 02<br><input type="radio"/> 03<br><input type="radio"/> 04<br><input type="radio"/> 05<br><input type="radio"/> 77<br><input type="radio"/> 88<br><input type="radio"/> 99 | <input type="radio"/> 01<br><input type="radio"/> 02<br><input type="radio"/> 03<br><input type="radio"/> 04<br><input type="radio"/> 05<br><input type="radio"/> 77<br><input type="radio"/> 88<br><input type="radio"/> 99 |
| <p>7.17 As far as you know, did [NAME] have more than one sexual regular partner at the same time (for example, you and a wife or a regular lover)?</p> <p>01 = No<br/>02 = Yes<br/>88 = Refusal<br/>99 = Don't Know</p>                                                                                                                         | <input type="radio"/> 01<br><input type="radio"/> 02<br><input type="radio"/> 88<br><input type="radio"/> 99                                                                                                                 | <input type="radio"/> 01<br><input type="radio"/> 02<br><input type="radio"/> 88<br><input type="radio"/> 99                                                                                                                 | <input type="radio"/> 01<br><input type="radio"/> 02<br><input type="radio"/> 88<br><input type="radio"/> 99                                                                                                                 | <input type="radio"/> 01<br><input type="radio"/> 02<br><input type="radio"/> 88<br><input type="radio"/> 99                                                                                                                 | <input type="radio"/> 01<br><input type="radio"/> 02<br><input type="radio"/> 88<br><input type="radio"/> 99                                                                                                                 |
| <p>7.201 Did you have sex the first time you met [NAME]?</p> <p>01 = No<br/>02 = Yes<br/>88 = Refusal<br/>99 = Don't Know</p>                                                                                                                                                                                                                    | <input type="radio"/> 01<br><input type="radio"/> 02<br><input type="radio"/> 88<br><input type="radio"/> 99                                                                                                                 | <input type="radio"/> 01<br><input type="radio"/> 02<br><input type="radio"/> 88<br><input type="radio"/> 99                                                                                                                 | <input type="radio"/> 01<br><input type="radio"/> 02<br><input type="radio"/> 88<br><input type="radio"/> 99                                                                                                                 | <input type="radio"/> 01<br><input type="radio"/> 02<br><input type="radio"/> 88<br><input type="radio"/> 99                                                                                                                 | <input type="radio"/> 01<br><input type="radio"/> 02<br><input type="radio"/> 88<br><input type="radio"/> 99                                                                                                                 |
| <p>7.211 Did you pay money, favors or drugs to [NAME] to have sex?</p> <p>01 = No<br/>02 = Yes<br/>88 = Refusal<br/>99 = Don't Know</p>                                                                                                                                                                                                          | <input type="radio"/> 01<br><input type="radio"/> 02<br><input type="radio"/> 88<br><input type="radio"/> 99                                                                                                                 | <input type="radio"/> 01<br><input type="radio"/> 02<br><input type="radio"/> 88<br><input type="radio"/> 99                                                                                                                 | <input type="radio"/> 01<br><input type="radio"/> 02<br><input type="radio"/> 88<br><input type="radio"/> 99                                                                                                                 | <input type="radio"/> 01<br><input type="radio"/> 02<br><input type="radio"/> 88<br><input type="radio"/> 99                                                                                                                 | <input type="radio"/> 01<br><input type="radio"/> 02<br><input type="radio"/> 88<br><input type="radio"/> 99                                                                                                                 |
| <p>7.221 Did you receive money, favors or drugs from [NAME] in exchange for sex?</p> <p>01 = No<br/>02 = Yes<br/>88 = Refusal<br/>99 = Don't Know</p>                                                                                                                                                                                            | <input type="radio"/> 01<br><input type="radio"/> 02<br><input type="radio"/> 88<br><input type="radio"/> 99                                                                                                                 | <input type="radio"/> 01<br><input type="radio"/> 02<br><input type="radio"/> 88<br><input type="radio"/> 99                                                                                                                 | <input type="radio"/> 01<br><input type="radio"/> 02<br><input type="radio"/> 88<br><input type="radio"/> 99                                                                                                                 | <input type="radio"/> 01<br><input type="radio"/> 02<br><input type="radio"/> 88<br><input type="radio"/> 99                                                                                                                 | <input type="radio"/> 01<br><input type="radio"/> 02<br><input type="radio"/> 88<br><input type="radio"/> 99                                                                                                                 |
| <p>7.231 Did you have sex with [NAME] while under alcohol or drug influence?</p> <p>01 = No<br/>02 = Yes<br/>88 = Refusal<br/>99 = Don't Know</p>                                                                                                                                                                                                | <input type="radio"/> 01<br><input type="radio"/> 02<br><input type="radio"/> 88<br><input type="radio"/> 99                                                                                                                 | <input type="radio"/> 01<br><input type="radio"/> 02<br><input type="radio"/> 88<br><input type="radio"/> 99                                                                                                                 | <input type="radio"/> 01<br><input type="radio"/> 02<br><input type="radio"/> 88<br><input type="radio"/> 99                                                                                                                 | <input type="radio"/> 01<br><input type="radio"/> 02<br><input type="radio"/> 88<br><input type="radio"/> 99                                                                                                                 | <input type="radio"/> 01<br><input type="radio"/> 02<br><input type="radio"/> 88<br><input type="radio"/> 99                                                                                                                 |
| <p>7.232 Has [NAME] had sex with [Person 2] in the past 12 months?</p> <p>01 = No<br/>02 = Yes<br/>88 = Refusal<br/>99 = Don't know</p>                                                                                                                                                                                                          | <input type="radio"/> 01<br><input type="radio"/> 02<br><input type="radio"/> 88<br><input type="radio"/> 99                                                                                                                 |                                                                                                                                                                                                                              |                                                                                                                                                                                                                              |                                                                                                                                                                                                                              |                                                                                                                                                                                                                              |
| <p>7.233 Has [NAME] had sex with [Person 3] in the past 12 months?</p> <p>01 = No<br/>02 = Yes<br/>88 = Refusal<br/>99 = Don't know</p>                                                                                                                                                                                                          | <input type="radio"/> 01<br><input type="radio"/> 02<br><input type="radio"/> 88<br><input type="radio"/> 99                                                                                                                 | <input type="radio"/> 01<br><input type="radio"/> 02<br><input type="radio"/> 88<br><input type="radio"/> 99                                                                                                                 |                                                                                                                                                                                                                              |                                                                                                                                                                                                                              |                                                                                                                                                                                                                              |
| <p>7.234 Has [NAME] had sex with [Person 4] in the past 12 months?</p> <p>01 = No<br/>02 = Yes<br/>88 = Refusal<br/>99 = Don't know</p>                                                                                                                                                                                                          | <input type="radio"/> 01<br><input type="radio"/> 02<br><input type="radio"/> 88<br><input type="radio"/> 99                                                                                                                 | <input type="radio"/> 01<br><input type="radio"/> 02<br><input type="radio"/> 88<br><input type="radio"/> 99                                                                                                                 | <input type="radio"/> 01<br><input type="radio"/> 02<br><input type="radio"/> 88<br><input type="radio"/> 99                                                                                                                 |                                                                                                                                                                                                                              |                                                                                                                                                                                                                              |

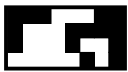

Draft

# TRUST QUESTIONNAIRE

MODULE 8 - Composition and Influence of MSM Social Network

VISIT 1

Study Number:

Visit Date (dd/mm/yyyy)

 /  / 

|                                                                                                                                                           | FIVE MOST RESENT SEXUAL PARTNERS                                                                             |                                                                                                              |                                                                                                              |                                                                                                              |                      |
|-----------------------------------------------------------------------------------------------------------------------------------------------------------|--------------------------------------------------------------------------------------------------------------|--------------------------------------------------------------------------------------------------------------|--------------------------------------------------------------------------------------------------------------|--------------------------------------------------------------------------------------------------------------|----------------------|
|                                                                                                                                                           | 1.                                                                                                           | 2.                                                                                                           | 3.                                                                                                           | 4.                                                                                                           | 5.                   |
| 7.235 Has [NAME] had sex with [Person 5] in the past 12 months?<br>01 = No<br>02 = Yes<br>88 = Refusal<br>99 = Don't know                                 | <input type="radio"/> 01<br><input type="radio"/> 02<br><input type="radio"/> 88<br><input type="radio"/> 99 | <input type="radio"/> 01<br><input type="radio"/> 02<br><input type="radio"/> 88<br><input type="radio"/> 99 | <input type="radio"/> 01<br><input type="radio"/> 02<br><input type="radio"/> 88<br><input type="radio"/> 99 | <input type="radio"/> 01<br><input type="radio"/> 02<br><input type="radio"/> 88<br><input type="radio"/> 99 |                      |
| 7.27 From 0 (not sure at all) to 10 (100% sure), how sure are you about the information you have just given on [NAME]?<br>88 = Refusal<br>99 = Don't know | <input type="text"/>                                                                                         | <input type="text"/>                                                                                         | <input type="text"/>                                                                                         | <input type="text"/>                                                                                         | <input type="text"/> |

## MODULE 8 - Composition and Influence of MSM Social Network

8.01 Now, I would like you to think of all of the men that you know who have sex with other men? Can you tell me the initials or use a pseudonym for the five men you know who have sex with other men and with whom you would be most likely to discuss personal matters of importance to you. A pseudonym is a fake name that you can use in place of their real name. If you use a pseudonym, use one that will allow you to remember the person that you are using it for.

ENTER INITIALS OR PSEUDONYM OF FIVE CLOSEST MSM FRIENDS IN THE SPACE PROVIDED BELOW

1.

2.

3.

4.

5.

|                                                                                                                                                                                                                   | FIVE MOST RESENT SEXUAL PARTNERS                                                                                                                                     |                                                                                                                                                                      |                                                                                                                                                                      |                                                                                                                                                                      |                                                                                                                                                                      |
|-------------------------------------------------------------------------------------------------------------------------------------------------------------------------------------------------------------------|----------------------------------------------------------------------------------------------------------------------------------------------------------------------|----------------------------------------------------------------------------------------------------------------------------------------------------------------------|----------------------------------------------------------------------------------------------------------------------------------------------------------------------|----------------------------------------------------------------------------------------------------------------------------------------------------------------------|----------------------------------------------------------------------------------------------------------------------------------------------------------------------|
|                                                                                                                                                                                                                   | 1.                                                                                                                                                                   | 2.                                                                                                                                                                   | 3.                                                                                                                                                                   | 4.                                                                                                                                                                   | 5.                                                                                                                                                                   |
| 8.02 How frequently do you discuss HIV with [EACH PERSON]<br>01 = At least once a week<br>02 = At least once a month<br>03 = Less than once a month<br>04 = Never<br>88 = Refusal<br>99 = Don't know this person? | <input type="radio"/> 01<br><input type="radio"/> 02<br><input type="radio"/> 03<br><input type="radio"/> 04<br><input type="radio"/> 88<br><input type="radio"/> 99 | <input type="radio"/> 01<br><input type="radio"/> 02<br><input type="radio"/> 03<br><input type="radio"/> 04<br><input type="radio"/> 88<br><input type="radio"/> 99 | <input type="radio"/> 01<br><input type="radio"/> 02<br><input type="radio"/> 03<br><input type="radio"/> 04<br><input type="radio"/> 88<br><input type="radio"/> 99 | <input type="radio"/> 01<br><input type="radio"/> 02<br><input type="radio"/> 03<br><input type="radio"/> 04<br><input type="radio"/> 88<br><input type="radio"/> 99 | <input type="radio"/> 01<br><input type="radio"/> 02<br><input type="radio"/> 03<br><input type="radio"/> 04<br><input type="radio"/> 88<br><input type="radio"/> 99 |
| 8.04 Has [NAME] ever encouraged you to make sure a condom is used when you have sex with another man?<br>01 = No<br>02 = Yes<br>88 = Refused<br>99 = Don't know                                                   | <input type="radio"/> 01<br><input type="radio"/> 02<br><input type="radio"/> 88<br><input type="radio"/> 99                                                         | <input type="radio"/> 01<br><input type="radio"/> 02<br><input type="radio"/> 88<br><input type="radio"/> 99                                                         | <input type="radio"/> 01<br><input type="radio"/> 02<br><input type="radio"/> 88<br><input type="radio"/> 99                                                         | <input type="radio"/> 01<br><input type="radio"/> 02<br><input type="radio"/> 88<br><input type="radio"/> 99                                                         | <input type="radio"/> 01<br><input type="radio"/> 02<br><input type="radio"/> 88<br><input type="radio"/> 99                                                         |
| 8.05 Does [NAME] know (Person 2)?<br>01 = No<br>02 = Yes<br>88 = Refusal<br>99 = Don't know                                                                                                                       | <input type="radio"/> 01<br><input type="radio"/> 02<br><input type="radio"/> 88<br><input type="radio"/> 99                                                         |                                                                                                                                                                      |                                                                                                                                                                      |                                                                                                                                                                      |                                                                                                                                                                      |
| 8.06 Does [NAME] know (Person 3)?<br>01 = No<br>02 = Yes<br>88 = Refusal<br>99 = Don't know                                                                                                                       | <input type="radio"/> 01<br><input type="radio"/> 02<br><input type="radio"/> 88<br><input type="radio"/> 99                                                         | <input type="radio"/> 01<br><input type="radio"/> 02<br><input type="radio"/> 88<br><input type="radio"/> 99                                                         |                                                                                                                                                                      |                                                                                                                                                                      |                                                                                                                                                                      |
| 8.07 Does [NAME] know (Person 4)?<br>01 = No<br>02 = Yes<br>88 = Refusal<br>99 = Don't know                                                                                                                       | <input type="radio"/> 01<br><input type="radio"/> 02<br><input type="radio"/> 88<br><input type="radio"/> 99                                                         | <input type="radio"/> 01<br><input type="radio"/> 02<br><input type="radio"/> 88<br><input type="radio"/> 99                                                         | <input type="radio"/> 01<br><input type="radio"/> 02<br><input type="radio"/> 88<br><input type="radio"/> 99                                                         |                                                                                                                                                                      |                                                                                                                                                                      |
| 8.08 Does [NAME] know (Person 5)?<br>01 = No<br>02 = Yes<br>88 = Refusal<br>99 = Don't know                                                                                                                       | <input type="radio"/> 01<br><input type="radio"/> 02<br><input type="radio"/> 88<br><input type="radio"/> 99                                                         | <input type="radio"/> 01<br><input type="radio"/> 02<br><input type="radio"/> 88<br><input type="radio"/> 99                                                         | <input type="radio"/> 01<br><input type="radio"/> 02<br><input type="radio"/> 88<br><input type="radio"/> 99                                                         | <input type="radio"/> 01<br><input type="radio"/> 02<br><input type="radio"/> 88<br><input type="radio"/> 99                                                         |                                                                                                                                                                      |

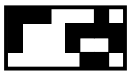

Draft

# TRUST QUESTIONNAIRE

## Module 9 - Condom Negotiation

VISIT 1

Study Number:

Visit Date (dd/mm/yyyy)

 /  / 

"I'm going to ask you several questions about using condoms and how difficult you may find it to negotiate condom use in different circumstances. For each situation, you can tell me if you find it very difficult, somewhat difficult, neither difficult nor easy, somewhat easy or very easy."

| No.  | Question                                                                                                                                      | Coded Responses (Shade in the appropriate circles)                                                                                                                                              |                                                                                                                                                                  |
|------|-----------------------------------------------------------------------------------------------------------------------------------------------|-------------------------------------------------------------------------------------------------------------------------------------------------------------------------------------------------|------------------------------------------------------------------------------------------------------------------------------------------------------------------|
| 9.07 | How difficult or easy is it for you to insist on condom use with a male sexual partner with whom you haven't always used condoms in the past? | <input type="radio"/> 01 = Very difficult<br><input type="radio"/> 02 = Somewhat difficult<br><input type="radio"/> 03 = Neither difficult nor easy<br><input type="radio"/> 04 = Somewhat easy | <input type="radio"/> 05 = Very easy<br><input type="radio"/> 77 = Not applicable<br><input type="radio"/> 88 = Refusal<br><input type="radio"/> 99 = Don't know |
| 9.10 | How difficult or easy is it for you to insist on condom use with a male sexual partner that provides you with regular, economic support?      | <input type="radio"/> 01 = Very difficult<br><input type="radio"/> 02 = Somewhat difficult<br><input type="radio"/> 03 = Neither difficult nor easy<br><input type="radio"/> 04 = Somewhat easy | <input type="radio"/> 05 = Very easy<br><input type="radio"/> 77 = Not applicable<br><input type="radio"/> 88 = Refusal<br><input type="radio"/> 99 = Don't know |
| 9.12 | How difficult or easy is it for you to negotiate using a condom during oral sex with your male sexual partner?                                | <input type="radio"/> 01 = Very difficult<br><input type="radio"/> 02 = Somewhat difficult<br><input type="radio"/> 03 = Neither difficult nor easy<br><input type="radio"/> 04 = Somewhat easy | <input type="radio"/> 05 = Very easy<br><input type="radio"/> 77 = Not applicable<br><input type="radio"/> 88 = Refusal<br><input type="radio"/> 99 = Don't know |

## Module 10 - Social Capital

"Now, I would like to ask you some questions about your social life with other MSM in your group of friends. I'm going to read some phrases and you can tell me if you strongly agree, mostly agree, mostly disagree, or strongly disagree."

| No.   | Question                                                                                                | Coded Responses (Shade in the appropriate circles)                                                                      |                                                                                                                          |
|-------|---------------------------------------------------------------------------------------------------------|-------------------------------------------------------------------------------------------------------------------------|--------------------------------------------------------------------------------------------------------------------------|
| 10.01 | You can count on other MSM in your group of friends if you need to borrow money.                        | <input type="radio"/> 00 = Strongly disagree<br><input type="radio"/> 01 = Disagree<br><input type="radio"/> 02 = Agree | <input type="radio"/> 03 = Strongly agree<br><input type="radio"/> 88 = Refusal<br><input type="radio"/> 99 = Don't know |
| 10.02 | You can count on other MSM in your group of friends to accompany you to the doctor or hospital          | <input type="radio"/> 00 = Strongly disagree<br><input type="radio"/> 01 = Disagree<br><input type="radio"/> 02 = Agree | <input type="radio"/> 03 = Strongly agree<br><input type="radio"/> 88 = Refusal<br><input type="radio"/> 99 = Don't know |
| 10.03 | You can count on other MSM in your group of friends if you need to talk about your problems.            | <input type="radio"/> 00 = Strongly disagree<br><input type="radio"/> 01 = Disagree<br><input type="radio"/> 02 = Agree | <input type="radio"/> 03 = Strongly agree<br><input type="radio"/> 88 = Refusal<br><input type="radio"/> 99 = Don't know |
| 10.04 | In general, MSM in your group of friends only worry about themselves.                                   | <input type="radio"/> 00 = Strongly disagree<br><input type="radio"/> 01 = Disagree<br><input type="radio"/> 02 = Agree | <input type="radio"/> 03 = Strongly agree<br><input type="radio"/> 88 = Refusal<br><input type="radio"/> 99 = Don't know |
| 10.05 | You can count on other MSM in your group of friends if you need somewhere to stay.                      | <input type="radio"/> 00 = Strongly disagree<br><input type="radio"/> 01 = Disagree<br><input type="radio"/> 02 = Agree | <input type="radio"/> 03 = Strongly agree<br><input type="radio"/> 88 = Refusal<br><input type="radio"/> 99 = Don't know |
| 10.06 | You can count on other MSM in your group of friends to help deal with a violent or difficult situation. | <input type="radio"/> 00 = Strongly disagree<br><input type="radio"/> 01 = Disagree<br><input type="radio"/> 02 = Agree | <input type="radio"/> 03 = Strongly agree<br><input type="radio"/> 88 = Refusal<br><input type="radio"/> 99 = Don't know |
| 10.07 | You can count on other MSM in your group of friends to help you find other MSM.                         | <input type="radio"/> 00 = Strongly disagree<br><input type="radio"/> 01 = Disagree<br><input type="radio"/> 02 = Agree | <input type="radio"/> 03 = Strongly agree<br><input type="radio"/> 88 = Refusal<br><input type="radio"/> 99 = Don't know |
| 10.08 | You can count on other MSM in your group of friends to support the use of condoms.                      | <input type="radio"/> 00 = Strongly disagree<br><input type="radio"/> 01 = Disagree<br><input type="radio"/> 02 = Agree | <input type="radio"/> 03 = Strongly agree<br><input type="radio"/> 88 = Refusal<br><input type="radio"/> 99 = Don't know |
| 10.09 | The group of friends with whom you socialize with is a mix of straight people and MSM.                  | <input type="radio"/> 00 = Strongly disagree<br><input type="radio"/> 01 = Disagree<br><input type="radio"/> 02 = Agree | <input type="radio"/> 03 = Strongly agree<br><input type="radio"/> 88 = Refusal<br><input type="radio"/> 99 = Don't know |

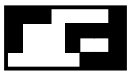

Draft

# TRUST QUESTIONNAIRE

# VISIT 1

## MODULE 10 - Social Capital

Study Number:

Visit Date (dd/mm/yyyy)

 /  / 

| No.   | Question                                                                                                                                                                                                | Coded Responses (Shade in the appropriate circles)                                                                                                                                                                                                                                                                                                                                                                                                                                         |
|-------|---------------------------------------------------------------------------------------------------------------------------------------------------------------------------------------------------------|--------------------------------------------------------------------------------------------------------------------------------------------------------------------------------------------------------------------------------------------------------------------------------------------------------------------------------------------------------------------------------------------------------------------------------------------------------------------------------------------|
| 10.10 | In general the MSM you socialize with are always arguing amongst each other.                                                                                                                            | <input type="radio"/> 00 = Strongly disagree <input type="radio"/> 03 = Strongly agree<br><input type="radio"/> 01 = Disagree <input type="radio"/> 88 = Refusal<br><input type="radio"/> 02 = Agree <input type="radio"/> 99 = Don't know                                                                                                                                                                                                                                                 |
| 10.11 | You can trust the majority of the MSM you know.                                                                                                                                                         | <input type="radio"/> 00 = Strongly disagree <input type="radio"/> 03 = Strongly agree<br><input type="radio"/> 01 = Disagree <input type="radio"/> 88 = Refusal<br><input type="radio"/> 02 = Agree <input type="radio"/> 99 = Don't know                                                                                                                                                                                                                                                 |
| 10.13 | In the past 12 months, how often have you participated in a meeting, march, rally, or gathering to promote the rights of MSM?                                                                           | <input type="radio"/> 00 = Never <input type="radio"/> 03 = Frequently<br><input type="radio"/> 01 = Once <input type="radio"/> 88 = Refusal<br><input type="radio"/> 02 = A couple of times <input type="radio"/> 99 = Don't know                                                                                                                                                                                                                                                         |
| 10.14 | In the past 12 months, how often have you gotten together with other men who have sex with men to speak with government officials or political leaders to address a problem or common issue facing MSM? | <input type="radio"/> 00 = Never <input type="radio"/> 03 = Frequently<br><input type="radio"/> 01 = Once <input type="radio"/> 88 = Refusal<br><input type="radio"/> 02 = A couple of times <input type="radio"/> 99 = Don't know                                                                                                                                                                                                                                                         |
| 10.15 | In the past 12 months, how often have you joined together with other MSM to address a common problem facing MSM?                                                                                        | <input type="radio"/> 00 = Never <input type="radio"/> 03 = Frequently<br><input type="radio"/> 01 = Once <input type="radio"/> 88 = Refusal<br><input type="radio"/> 02 = A couple of times <input type="radio"/> 99 = Don't know                                                                                                                                                                                                                                                         |
| 10.16 | In the past 12 months, how often have you participated in an HIV prevention organization or MSM rights group?                                                                                           | <input type="radio"/> 00 = Never <input type="radio"/> 03 = Frequently<br><input type="radio"/> 01 = Once <input type="radio"/> 88 = Refusal<br><input type="radio"/> 02 = A couple of times <input type="radio"/> 99 = Don't know                                                                                                                                                                                                                                                         |
| 10.22 | In the past 12 months, how often have you gone into a gay or bisexual chat room on the internet?<br>Was it:                                                                                             | <input type="radio"/> 01 = Did not go <input type="radio"/> 05 = About once a day<br><input type="radio"/> 02 = Once a month or less <input type="radio"/> 06 = Several times a day<br><input type="radio"/> 03 = About once a week <input type="radio"/> 88 = Refusal<br><input type="radio"/> 04 = Several times a week <input type="radio"/> 99 = Don't know                                                                                                                            |
| 10.23 | In the past 12 months, how often have you used the Internet to look for male sexual partners?<br>Was it:                                                                                                | <input type="radio"/> 01 = Did not use [skip to module 11] <input type="radio"/> 05 = About once a day<br><input type="radio"/> 02 = Once a month or less <input type="radio"/> 06 = Several times a day<br><input type="radio"/> 03 = About once a week <input type="radio"/> 88 = Refusal [skip to module 11]<br><input type="radio"/> 04 = Several times a week <input type="radio"/> 99 = Don't know [skip to module 11]                                                               |
| 10.24 | Which social networking sites did you mainly use?<br><br>(Select all that apply by shading in the circles provided. If other, refusal or don't know, then fill in the box provided)                     | <input type="radio"/> Facebook <input type="radio"/> Manjam.com <input type="radio"/> Other<br><input type="radio"/> Gay.com <input type="radio"/> Badoo.com <input type="radio"/> Refusal<br><input type="radio"/> Blackberry messenger <input type="radio"/> Whatsapp (Mobile app) <input type="radio"/> Don't know<br><input type="radio"/> Twitter <input type="radio"/> 2GO<br><input type="radio"/> Gaydar.co.uk <input type="radio"/> bdclive.com<br><br>(If other, specify): _____ |
| 10.25 | What devices did you mainly use?<br><br>(Select all that apply by shading in the circles provided. If other, refusal or don't know, then fill in the box provided)                                      | <input type="radio"/> Desktop/Laptop/tablet <input type="radio"/> Other<br><input type="radio"/> Smartphone/Phablet <input type="radio"/> Refusal<br><input type="radio"/> Feature phone <input type="radio"/> Don't know<br><br>(If other, specify): _____                                                                                                                                                                                                                                |

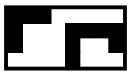

Draft

# TRUST QUESTIONNAIRE

MODULE 11 - Exposure to Health Information

## VISIT 1

Study Number:

Visit Date (dd/mm/yyyy)  /  /

"In this next section, I will be asking you some questions so that I can understand how much health information you may have been exposed to. This is the last section and it will be very short"

| No.   | Question                                                                                                            | Coded Responses (Shade in the appropriate circles)                                                                                                                                                                                                                                                                                                                                                    |
|-------|---------------------------------------------------------------------------------------------------------------------|-------------------------------------------------------------------------------------------------------------------------------------------------------------------------------------------------------------------------------------------------------------------------------------------------------------------------------------------------------------------------------------------------------|
| 11.01 | In the last 12 months, have you received information on prevention of HIV infection from sex between men and women? | <input type="radio"/> 01 = No [skip to 11.03]<br><input type="radio"/> 02 = Yes<br><br><input type="radio"/> 88 = Refusal [skip to 11.03]<br><input type="radio"/> 99 = Don't know [skip to 11.03]                                                                                                                                                                                                    |
| 11.02 | Where did you receive this information?                                                                             | <input type="radio"/> 01 = Health Facility<br><input type="radio"/> 02 = Peer Educator/workshop<br><input type="radio"/> 03 = School<br><input type="radio"/> 04 = Internet<br><input type="radio"/> 05 = Friends<br><input type="radio"/> 06 = Media<br><input type="radio"/> 88 = Refusal<br><input type="radio"/> 99 = Don't know                                                                  |
| 11.03 | In the last 12 months, have you received information on prevention of HIV infection from sex between men?           | <input type="radio"/> 01 = No [skip to 11.05]<br><input type="radio"/> 02 = Yes<br><br><input type="radio"/> 88 = Refusal [skip to 11.05]<br><input type="radio"/> 99 = Don't know [skip to 11.05]                                                                                                                                                                                                    |
| 11.04 | Where did you get this information?                                                                                 | <input type="radio"/> 01 = Health Facility<br><input type="radio"/> 02 = Peer Educator/workshop<br><input type="radio"/> 03 = School<br><input type="radio"/> 04 = Internet<br><input type="radio"/> 05 = Friends<br><input type="radio"/> 06 = Media<br><input type="radio"/> 88 = Refusal<br><input type="radio"/> 99 = Don't know                                                                  |
| 11.05 | In the last 12 months, how worried would you say you have been about HIV/AIDS?                                      | <input type="radio"/> 01 = Not at all worried<br><input type="radio"/> 02 = Not very worried<br><input type="radio"/> 03 = Somewhat worried<br><input type="radio"/> 04 = Very worried<br><input type="radio"/> 88 = Refusal<br><input type="radio"/> 99 = Don't know                                                                                                                                 |
| 11.06 | In the last 12 months, have you participated in any talks or meetings related to HIV/AIDS?                          | <input type="radio"/> 01 = No [skip to 11.08]<br><input type="radio"/> 02 = Yes<br><br><input type="radio"/> 88 = Refusal [skip to 11.08]<br><input type="radio"/> 99 = Don't know [skip to 11.08]                                                                                                                                                                                                    |
| 11.07 | Who hosted these talks or meetings?                                                                                 | <input type="radio"/> 11 = TIER<br><input type="radio"/> 12 = Population Council<br><input type="radio"/> 13 = Heartland Alliance<br><input type="radio"/> 14 = SHIPs for MARPs<br><input type="radio"/> 15 = Global Fund (SFH)<br><input type="radio"/> 16 = Other (If other, specify): _____<br><input type="radio"/> 88 = Refusal<br><input type="radio"/> 99 = Don't know                         |
| 11.08 | In the last 12 months, have you participated in any talks or meetings related to HIV/AIDS with other MSM?           | <input type="radio"/> 01 = No information [End Questionnaire]<br><input type="radio"/> 02 = Health Facility<br><input type="radio"/> 03 = Peer Educator/workshop<br><input type="radio"/> 04 = School<br><input type="radio"/> 05 = Internet<br><input type="radio"/> 06 = Friends<br><input type="radio"/> 07 = Media<br><input type="radio"/> 88 = Refusal<br><input type="radio"/> 99 = Don't know |
| 11.09 | Who hosted these talks or meetings with other MSM?                                                                  | <input type="radio"/> 01 = Heartland<br><input type="radio"/> 03 = CRH<br><input type="radio"/> 04 = Population council<br><input type="radio"/> 08 = FHI<br><input type="radio"/> 09 = SFH<br><input type="radio"/> 10 = APIN<br><input type="radio"/> 11 = TIER<br><input type="radio"/> 12 = Other (specify) _____<br><input type="radio"/> 88 = Refusal<br><input type="radio"/> 99 = Don't know  |

*End of questionnaire*

*"Thank you for taking the time to sit with me. I know we have gone through many questions and I really appreciate your time and openness. We are finished with the long part of the study. Do you feel ready to proceed with clinical care?"*

*Perform HCT (if Visit 1-7 and the participant was negative at previous visit or status unknown), Or escort to Nurse Case Manager (if Visit 1-7 and the participant's HIV status is positive)*
